# Supplementary material
Source: PubMed Central journal article supplement (PMC164479)

**BaF3**

**BaF3-P210**

**+ IL-3**

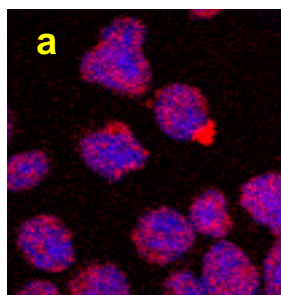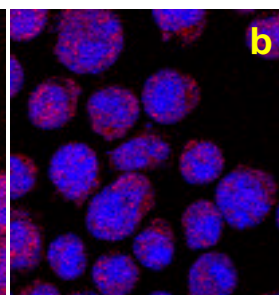

**- IL-3**

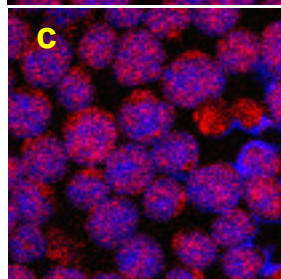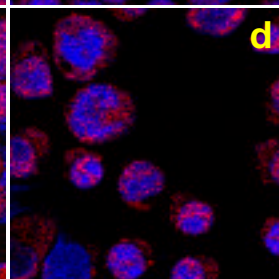

Supplement: pnas_0731871100_3.pdf [file pnas_0731871100_3.pdf]
